# Supplementary material for: Development and Characterization of Monoclonal Antibodies for the Mycotoxin Citreoviridin
Source: MDPI journal article supplement (doi:10.3390/toxins11110630), 2019-10-30
Supplement: s1 [file s1]

# Supplementary Materials: Development and Characterization of Monoclonal Antibodies for the Mycotoxin Citreoviridin

Chris M. Maragos , Yosuke Uchiyama, Naoki Kobayashi, Fumichika Kominato and Yoshiko Sugita-Konishi

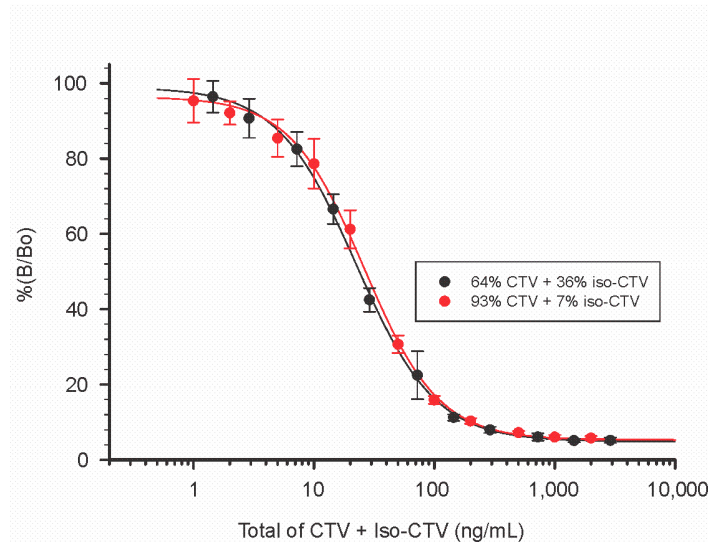

**Figure S1.** Effect of iso-CTV on the calibration curve in diluted rice matrix using mAb 2-4. Data are averages from 3 plates  $\pm$  1 standard deviation. IC<sub>50</sub>'s were  $27.0 \pm 3.4$  ng/mL and  $23.6 \pm 1.0$  ng/mL for the low iso-CTV (i.e. 7%) and high iso-CTV preparation (i.e. 36%) respectively. The similar responses from the two preparations, despite their very different proportions of iso-CTV, suggested that mAb 2-4 cross-reacted with iso-CTV.

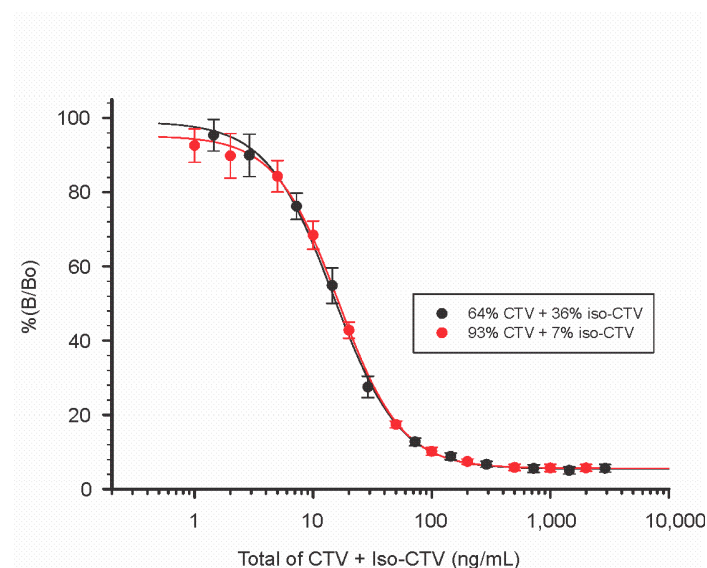

**Figure S2.** Effect of iso-CTV on the calibration curve in diluted rice matrix using mAb 2-2. Data are averages from 3 plates  $\pm$  1 standard deviation. IC<sub>50</sub>'s were  $16.5 \pm 0.3$  ng/mL and  $15.7 \pm 0.4$  ng/mL for the low iso-CTV

(i.e. 7%) and high iso-CTV preparation (i.e. 36%) respectively. The similar responses from the two preparations, despite their very different proportions of iso-CTV, suggested that mAb 2-2 cross-reacted with iso-CTV.
